# Supplementary material
Source: publisher figshare collection journal article supplement (https://gsajournals.figshare.com/articles/dataset/_/7523549)
Supplement: Supplementary file 1 [file 1]

## Sheet: TableS24
Table S24 Transcription factors(TF) present in sequenced Rosaceae plant.
TF-family	Mb	Md	Pb	Pp	Pm	Fv
AP2	36	36	35	19	20	17
ARF	28	34	31	17	16	17
ARR-B	13	14	13	12	10	7
B3	69	78	64	66	57	77
BBR-BPC	6	6	7	4	3	3
BES1	17	14	12	9	8	6
C2H2	147	137	134	80	83	83
C3H	75	83	66	46	43	38
CAMTA	10	11	10	4	4	7
CO-like	14	17	13	9	8	7
CPP	10	15	11	6	7	6
DBB	9	7	11	6	6	6
Dof	47	58	46	26	24	23
E2F/DP	9	12	9	6	8	7
EIL	9	12	13	4	5	6
ERF	157	189	194	107	94	92
FAR1	36	50	19	78	22	82
G2-like	65	65	63	36	37	37
GATA	30	29	32	22	20	19
GRAS	87	100	99	49	48	51
GRF	11	15	10	10	10	10
GeBP	9	12	8	8	7	6
HB-PHD	3	4	4	2	2	2
HB-other	12	17	10	7	7	11
HD-ZIP	62	69	56	33	31	28
HRT-like	2	2	0	1	1	3
HSF	27	37	37	21	18	15
LBD	57	67	68	42	41	36
LFY	2	1	2	1	1	4
LSD	5	7	4	4	3	3
M-type_MADS	68	48	60	52	46	48
MIKC_MADS	39	44	35	28	32	37
MYB	180	224	184	121	118	110
MYB_related	110	109	106	55	56	65
NAC	175	198	185	115	113	127
NF-X1	4	2	3	2	2	2
NF-YA	10	17	16	7	6	6
NF-YB	24	29	23	14	15	14
NF-YC	14	18	15	9	9	9
NZZ/SPL	3	2	4	2	2	1
Nin-like	11	13	15	8	8	10
RAV	7	10	11	5	5	5
S1Fa-like	3	3	2	1	1	1
SAP	3	4	1	1	2	1
SBP	37	37	33	17	16	14
SRS	10	9	7	6	5	5
STAT	1	1	2	1	1	1
TALE	36	40	36	22	18	18
TCP	35	37	34	19	19	18
Trihelix	48	68	53	33	29	31
VOZ	3	5	3	3	2	2
WOX	17	21	17	10	10	14
WRKY	111	129	112	61	60	58
Whirly	3	4	2	2	2	1
YABBY	12	11	9	7	6	5
ZF-HD	20	23	18	10	9	9
bHLH	208	232	197	133	118	112
bZIP	89	102	89	50	51	52
Total	2345	2638	2353	1529	1405	1485
Mb, Malus baccata; Md, Malus domestica; Pb, Pyrus bretschneideri; Pp, Prunus persica; Pm, Prunus mume; Fv, Fragaria vesca
